# Supplementary material for: Doomed descent? How fast sulphate signals diffuse in the EPICA Dome C ice column
Source: Copernicus journal article supplement (doi:10.5194/egusphere-2025-1566), 2025-05-19
Supplement: Supplementary file 1 [file egusphere-2025-1566-supplement.pdf]

Supplement of “Doomed descent? How fast sulphate signals diffuse in the EPICA Dome C ice column” by Felix S. L. Ng et al.

Contents: Figures S1, S2, and S3

5

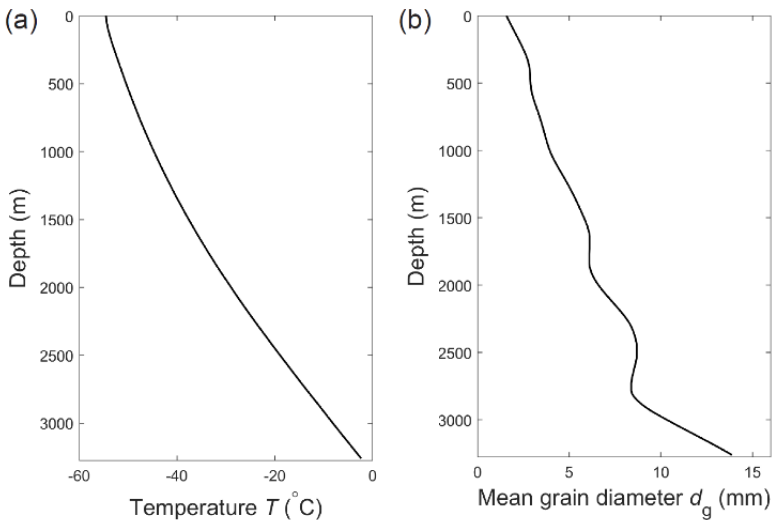

Figure S1. Measured profiles of (a) temperature and (b) mean grain diameter (smoothed version of the data from Durand et al. (2006)) at the EPICA Dome C core site.

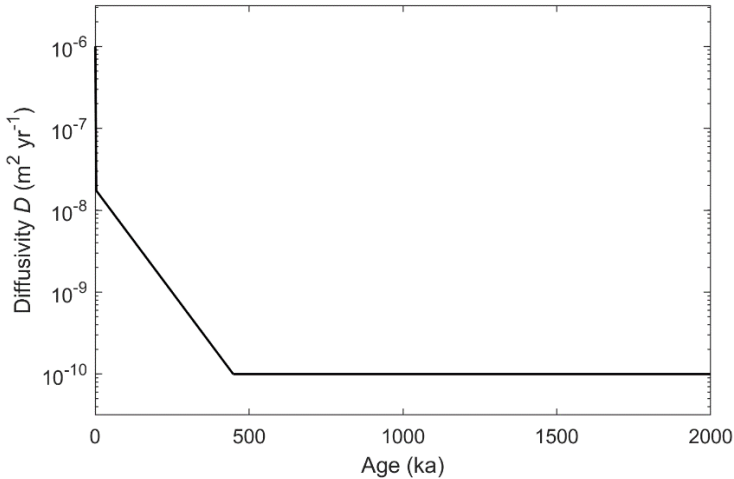

10 Figure S2. Assumed diffusivity profile  $D(t)$  used to estimate the sulphate diffusion lengths at the BE-OI and MYIC core sites.

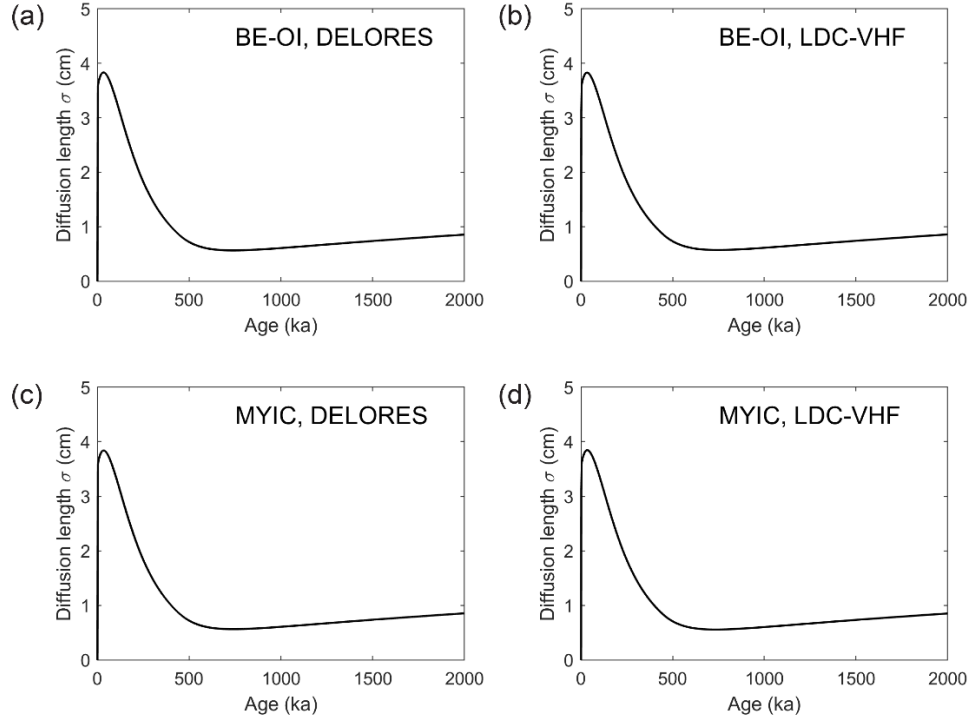

Figure S3. Sulphate diffusion length at the (a, b) BE-OI and (c, d) MYIC core sites at Little Dome C in Antarctica, estimated  
 15 from Eq. (24) with the diffusivity profile in Fig. S2 and the thinning factor  $S$  derived from the modelled age–depth profiles of  
 Chung et al. (2023); see their Table 5 for more information. DELORES and LDC-VHF refer to the two different radar datasets  
 used in their study to constrain the age–depth profiles.
